# Supplementary material for: Direct Current Electrical Fields Improve Experimental Wound Healing by Activation of Cytokine Secretion and Erk1/2 Pathway Stimulation
Source: MDPI journal article supplement (doi:10.3390/life11111195), 2021-11-05
Supplement: s1 [file s1]

# Supplementary Materials: Direct Current Electrical Fields Improve Experimental Wound Healing by Activation of Cytokine Secretion and Erk1/2 Pathway Stimulation

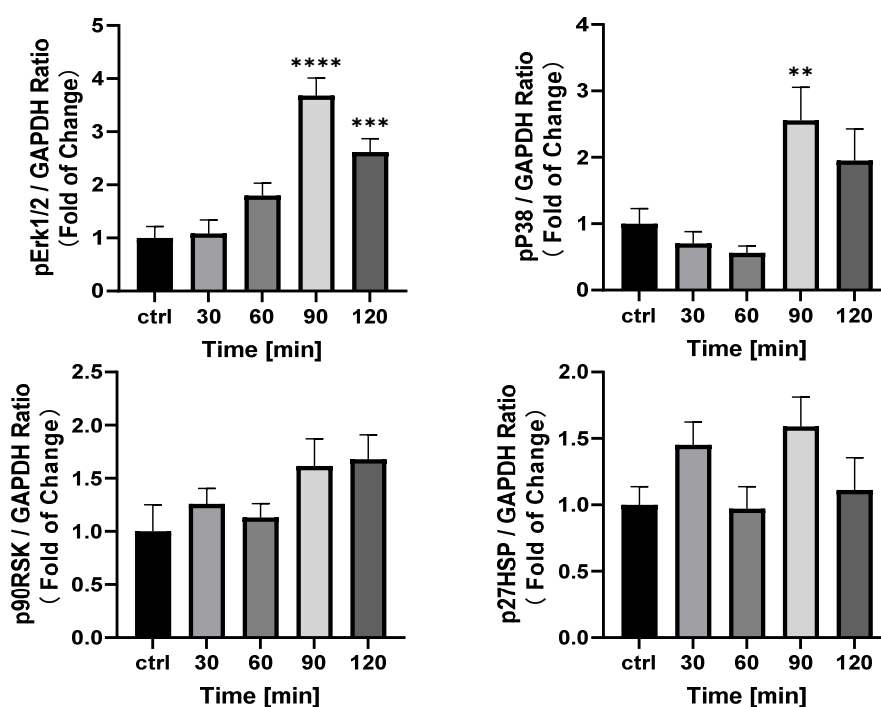

Figure S1. Quantitative analysis of phospho-Erk1/2, phospho-P38, phospho-90RSK, and phospho-27HSP abundance 30, 60, 90, and 120 min after exposure to an EF of 200 mV/mm. N = 3, n = 3. Data were compared by non-parametric two-way ANOVA followed by Tukey's multiple comparison test: \*\* p < 0.01, \*\*\* p < 0.001, \*\*\*\* p < 0.0001, as compared to the control (no EF).

Table S1. Densitometry Readings/intensity Ratio.

|        | pErk1/2 / GAPDH | pP38 / GAPDH | p90RSK / GAPDH | p27HSP / GAPDH |
|--------|-----------------|--------------|----------------|----------------|
| Ctrl   | 1.00000         | 1.00000      | 1.00000        | 1.00000        |
| 30min  | 1.07955         | 0.70071      | 1.25670        | 1.45103        |
| 60min  | 1.79286         | 0.55721      | 1.13016        | 0.97144        |
| 90min  | 3.67647         | 2.55619      | 1.61508        | 1.58866        |
| 120min | 2.61600         | 1.94847      | 1.67817        | 1.11156        |

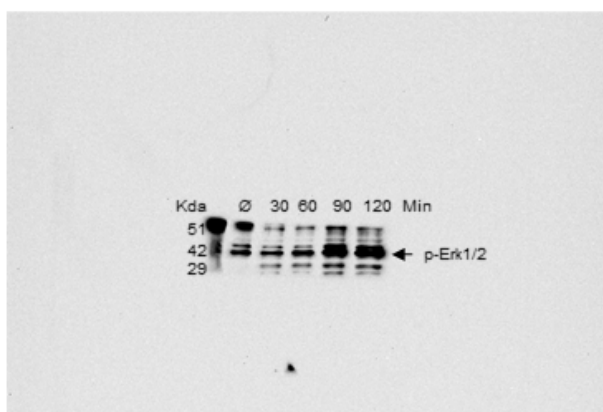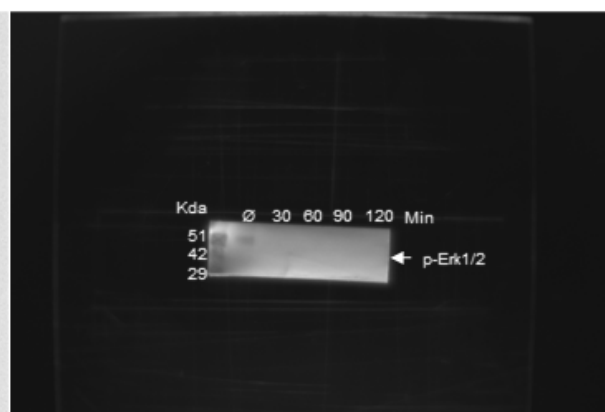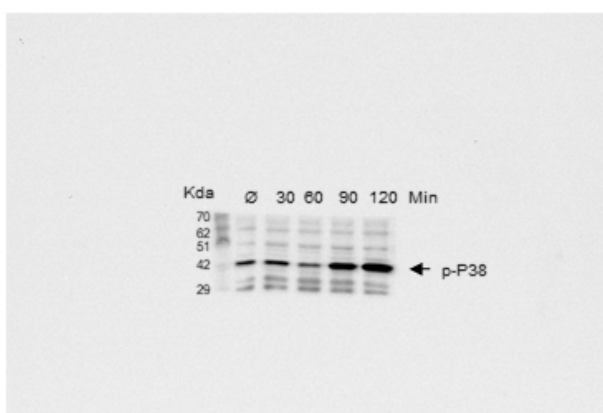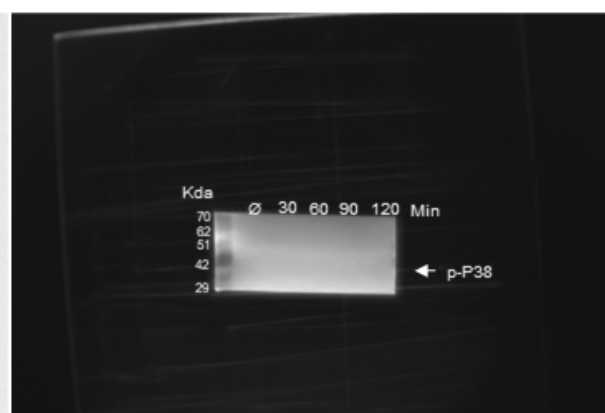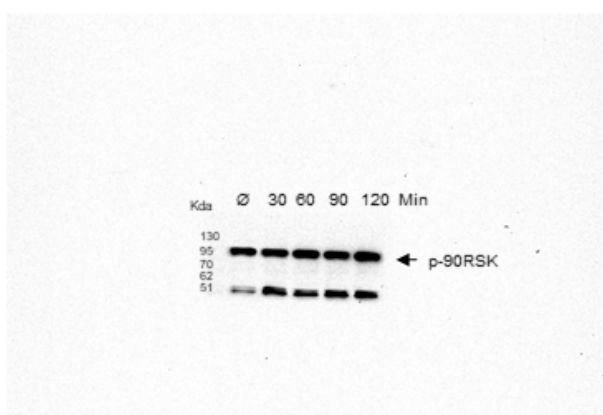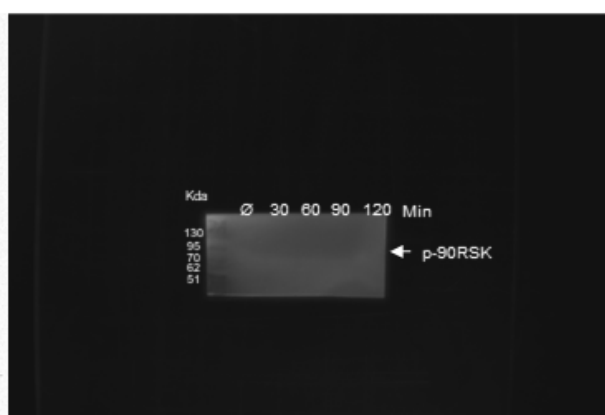

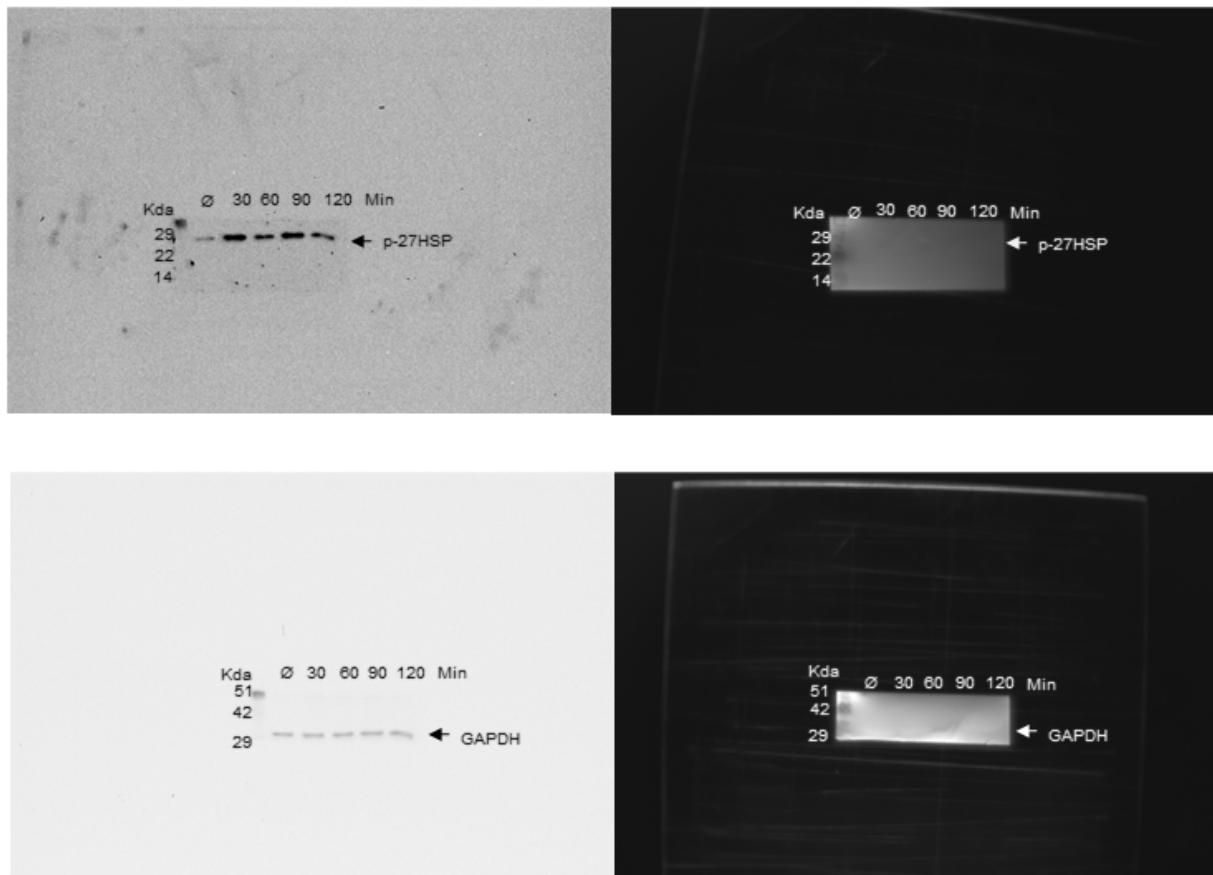

**Figure S2. Regulation of Erk1/2 and P38 by EF** Western blot signals (with white background) and the corresponding plain images (with black background) for phospho-Erk1/2, phospho-p38, phospho-90RSK, and phospho-HSP27 in HaCaT cells 30, 60, 90, and 120 min after exposure to an EF of 200 mV/mm. The expression of GAPDH was used as a loading control.
